# Supplementary material for: Young microbiome transplantation enhances recovery after myocardial infarction
Source: publisher site journal article supplement (doi:10.18632/aging.206279), 2025-07-15
Supplement: Supplementary file [file aging-v17-206279-supplementary-material-SD1.pdf]

SUPPLEMENTARY FIGURE

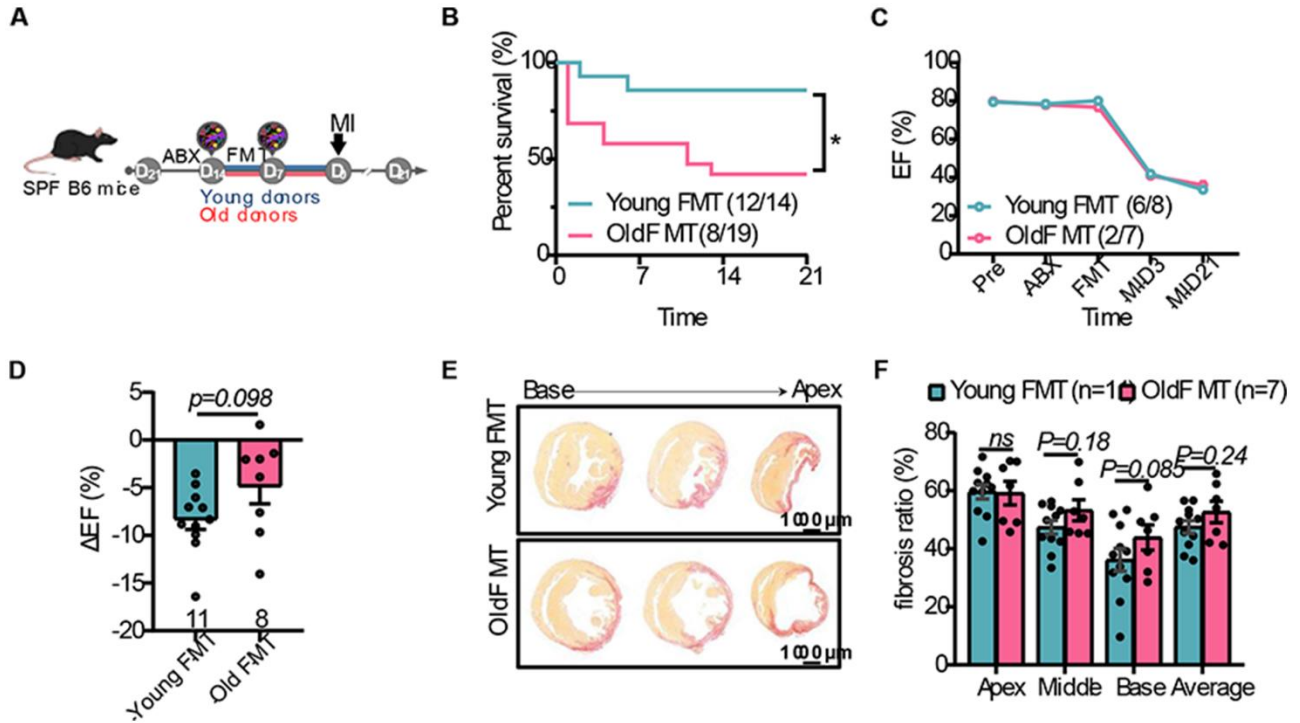

**Supplementary Figure 1. Impact of aged fecal microbiome transplantation (FMT) on cardiac function in recipient male mice.**

(A) Male specific pathogen-free (SPF) mice were administrated with antibiotics (ABX) and subsequently subjected to FMT from young and aged mice prior myocardial infarction (MI). (B) The post-MI survival curve for male mice subjected to FMT from young and aged mice. (C) Cardiac ejection fraction (EF, %) of male mice before and after FMT and MI. (D) Quantification of cardiac ejection fraction changes (EF, %) in male mice receiving FMT from young or aged donors. (E) Picrosirius red staining for post-MI cardiac fibrosis of male mice receiving FMT. (F) Statistical analysis of post-MI cardiac fibrosis of female mice receiving FMT. Two-way ANOVA with Tukey post-hoc test was used to analyze data in (C, D, F) Data are represented as mean  $\pm$  SEM.
